# Supplementary material for: DNA damage and oxidative stress response to selenium yeast in the non-smoking individuals: a short-term supplementation trial with respect to GPX1 and SEPP1 polymorphism
Source: Springer Nature journal article supplement (doi:10.1007/s00394-015-1118-4), 2015-12-10
Supplement: MOESM20 [file 8392588]

**Supplementary materials (Table S1, Table S2, Table S3, Supplementary figure's legend)**

**Article title:** DNA damage and oxidative stress response to selenium yeast in non-smoking individuals - short term supplementation trial with respect to *GPXI* and *SEPP1* polymorphism

**Journal:** European Journal of Nutrition

**Authors:** Jablonska E., Raimondi S., Gromadzinska J., Reszka E., Wieczorek E., Krol MB., Smok-Pieniazek A., Nocun M., Stepnik M., Socha K., Borawska MH., Wasowicz W.

**Corresponding author:**

Ewa Jablonska

Nofer Institute of Occupational Medicine, Department of Toxicology and Carcinogenesis, St. Teresy 8 Street,  
91-348 Lodz, Poland

e-mail: [ewa@imp.lodz.pl](mailto:ewa@imp.lodz.pl), Phone: +48 42 6314 612, Fax: +48 42 6356 83 31

**Table S1.** Nucleotide sequences of primers and products' length for Real Time PCR.

| <b>Gene</b>  | <b>Gene product</b>                      | <b>NCBI accession number</b> | <b>Starter F<sup>1</sup></b>      | <b>Starter R<sup>1</sup></b>     | <b>Amplicon size (nt)</b> |
|--------------|------------------------------------------|------------------------------|-----------------------------------|----------------------------------|---------------------------|
| <i>GPX1</i>  | Glutathione peroxidase 1                 | NM_000581                    | caa cca gtt tgg gc<br>tca g       | gtt cac ctc gca<br>ctt ctc g     | 121                       |
| <i>GPX4</i>  | Glutathione peroxidase 4                 | NM_002085                    | ccc gat acg ctg agt<br>gtg gtt tg | tta ctc cct ggc<br>tcc tgc ttc c | 76                        |
| <i>SEPP1</i> | Selenoprotein P                          | NM_005410                    | cag cct gga gca taa<br>gag        | cga gaa gag att<br>cct tga tg    | 196                       |
| <i>SEP15</i> | 15 kDa selenoprotein                     | NM_004261                    | ttg ggc tac ggt tgt<br>tgt t      | gca tgc ctc cga<br>tga aaa       | 77                        |
| <i>SBP2</i>  | SECIS binding protein                    | AF380995                     | atc tcc act cct tcg gtt<br>g      | gtc ggt aac aca<br>agc atc c     | 180                       |
| <i>SELS</i>  | Selenoprotein S                          | NM_203472                    | cgg atg agg cta aga<br>atc ttg t  | cag agc gct cct<br>caa gag at    | 103                       |
| <i>SEPWI</i> | Selenoprotein W                          | NM_003009                    | ttg gct cag ggc taa<br>tgc        | ttc cta tca tga<br>agc gtc tgc   | 82                        |
| <i>TRXR1</i> | Thioredoxin reductase 1                  | NM_003330                    | aca caa agc ttc agc<br>atg tca    | caa ttc cga gag<br>cgt tcc       | 63                        |
| <i>GAPDH</i> | Glyceraldehyde 3-phosphate dehydrogenase | NM_002046                    | agc cac atc gct cag<br>aca c      | gcc caa tac gac<br>caa atc c     | 66                        |

<sup>1</sup> from 5' to 3'

**Table S2.** Questionnaire data collected from 95 selenium supplemented subjects during trial and during washout, concerning consumption of drugs, hormones, dietary supplements and herbs.

| Type of consumption                   | Number of subjects (%) |                |
|---------------------------------------|------------------------|----------------|
|                                       | During supplementation | During washout |
| Non-steroidal anti-inflammatory drugs | 41 (43.2)              | 26 (27.4)      |
| Antibiotics                           | 11 (11.6)              | 4 (4.2)        |
| Antihistamines                        | 8 (8.4)                | 6 (6.3)        |
| Statins                               | 0 (0.0)                | 0 (0.0)        |
| Hormones                              | 8 (8.4)                | 6 (6.3)        |
| Dietary supplements*                  | 10 (10.5)              | 10 (10.5)      |
| Sporadic use                          | 8 (8.4)                | 8 (8.4)        |
| Regular use                           | 2 (2.1)                | 2 (2.1)        |
| Selenium supplements                  | 0 (0.0)                | 0 (0.0)        |
| Herbs                                 | 14 (14.7)              | 9 (9.5)        |

\* - multivitamins and/or minerals (excluding selenium)

**Table S3.** The effects of *GPXI* rs1050450 and *SEPP1* rs3877899 on mRNA expression and the interaction with time.

| Gene         | <i>p</i> -value for genotype effect (regardless of time, F test)*<br>and for time interaction (MANCOVA)* |                        |                                                   |
|--------------|----------------------------------------------------------------------------------------------------------|------------------------|---------------------------------------------------|
|              | <i>GPXI</i> rs1050450                                                                                    | <i>SEPP1</i> rs3877899 | <i>GPXI</i> rs1050450<br>x <i>SEPP1</i> rs3877899 |
| <i>GPXI</i>  | <i>p</i> =0.37                                                                                           | <i>p</i> =0.96         | <i>p</i> =0.95                                    |
| <i>GPX4</i>  | <i>p</i> =0.64                                                                                           | <i>p</i> =0.79         | <i>p</i> =0.98                                    |
| <i>TRXR1</i> | <i>p</i> =0.95                                                                                           | <i>p</i> =0.72         | <i>p</i> =0.62                                    |
| <i>SEPP1</i> | <i>p</i> =0.76                                                                                           | <i>p</i> =0.92         | <i>p</i> =0.41                                    |
| <i>SEPI5</i> | <i>p</i> =1.00                                                                                           | <i>p</i> =0.96         | <i>p</i> =0.58                                    |
|              | <b>Interaction with time</b><br><b><i>p</i>=0.03</b>                                                     |                        |                                                   |
| <i>SELS</i>  | <i>p</i> =0.87                                                                                           | <i>p</i> =0.98         | <i>p</i> =0.63                                    |
| <i>SELW</i>  | <i>p</i> =0.74                                                                                           | <i>p</i> =0.91         | <i>p</i> =0.72                                    |
| <i>SBP2</i>  | <i>p</i> =1.00                                                                                           | <i>p</i> =1.00         | <i>p</i> =0.46                                    |

\* models adjusted for age, sex, BMI and baseline plasma Se  
Statistically significant *p*-values are typed in bold and supplied with graphical explanation on the assigned figure. For the interaction with time, only statistically significant *p*-values are presented

### Supplementary figure's legend

**Figure S1.** Distribution of combined *GPX1* and *SEPP1* genotypes within study group (95 subjects). 0 – wild type homozygote, 1 – heterozygote, 2 – recessive homozygote.

**Figure S2.** Data from dietary questionnaires collected from selenium supplemented subjects, concerning consumption of food products with high Se content (eggs, fish and nuts) – during supplementation and during washout.

**Figure S3.** Nonsignificant effect of *GPX1* rs1050450 polymorphism on plasma Se (a), plasma Sepp1 (b), SOD1 activity (c), Cp activity (d), plasma TBARS (e), plasma TAC (f), and RFT (g), and nonsignificant effect of *SEPP1* rs3877899 polymorphism on plasma Se (h), plasma Sepp1 (i), GPx1 activity (j), GPx3 activity (k), Cp activity (l), plasma TBARS (m), plasma TAC (n), RFT (o), DNA strand breaks (p) and DNA oxidation (q). Relevant p-values indicated in Table 5.
